# Supplementary material for: Loading Graphene Quantum Dots into Optical-Magneto Nanoparticles for Real-Time Tracking In Vivo
Source: MDPI journal article supplement (doi:10.3390/ma12132191), 2019-07-08
Supplement: s1 [file s1]

Communication

# Loading graphene quantum dots into optical-magneto nanoparticles for real-time tracking in vivo

Yu Wang <sup>1,2</sup>, Nan Xu <sup>1,2</sup>, Yongkai He <sup>1,2,3</sup>, Jingyun Wang <sup>4</sup>, Dan Wang <sup>1,2</sup>, Qin Gao <sup>1,2</sup>, Siyu Xie <sup>1,2</sup>, Yage Li <sup>1,2</sup>, Ranran Zhang <sup>3,\*</sup> and Qiang Cai <sup>1,2,3,\*</sup>

<sup>1</sup> State key laboratory of New Ceramics and Fine Processing, School of Materials Science and Engineering, Tsinghua University, Beijing 100084, China

<sup>2</sup> Key Laboratory of Advanced Materials of Ministry of Education of China, Tsinghua University, Beijing100084, China

<sup>3</sup> Tsinghua Shenzhen International Graduate School, Tsinghua University, Shenzhen 518055, China

<sup>4</sup> Shenzhen Geim Graphene Center, Tsinghua-Berkeley Shenzhen Institute, Tsinghua University, Shenzhen 518055, China

\* Correspondence: biomnano@163.com (R.Z.); caiqiang@mail.tsinghua.edu.cn (Q.C.)

Academic Editor: name

Received: date; Accepted: date; Published: date

Dynamic light scattering (DLS; Malvern Instruments Zetasizer Nano ZS90 ,UK) was employed to measure the hydrodynamic diameter of the nanocomposites and the result was shown in **Figure S1** (supporting information). It could be seen that the hydrodynamic diameters of the nanocomposites distributed from 50 nm to 200 nm, which was consistent with the result of HRTEM.

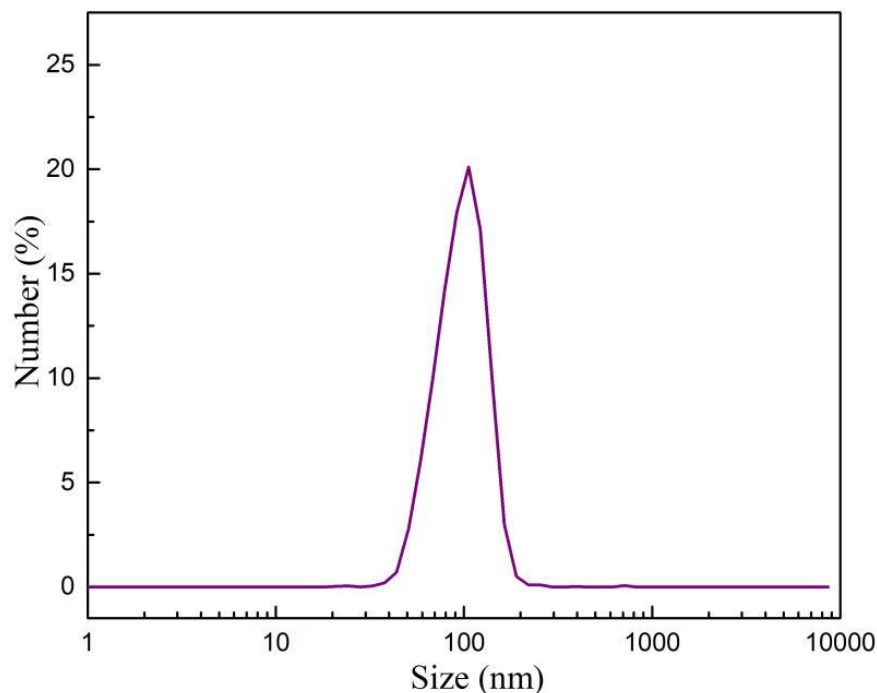

**Figure S1.** Hydrodynamic size of GQDs-NPs nanocomposites.
